# Supplementary material
Source: Frontiers journal article supplement (https://www.frontiersin.org/articles/175397)
Supplement: Image_1.PDF [file Image_1.PDF]

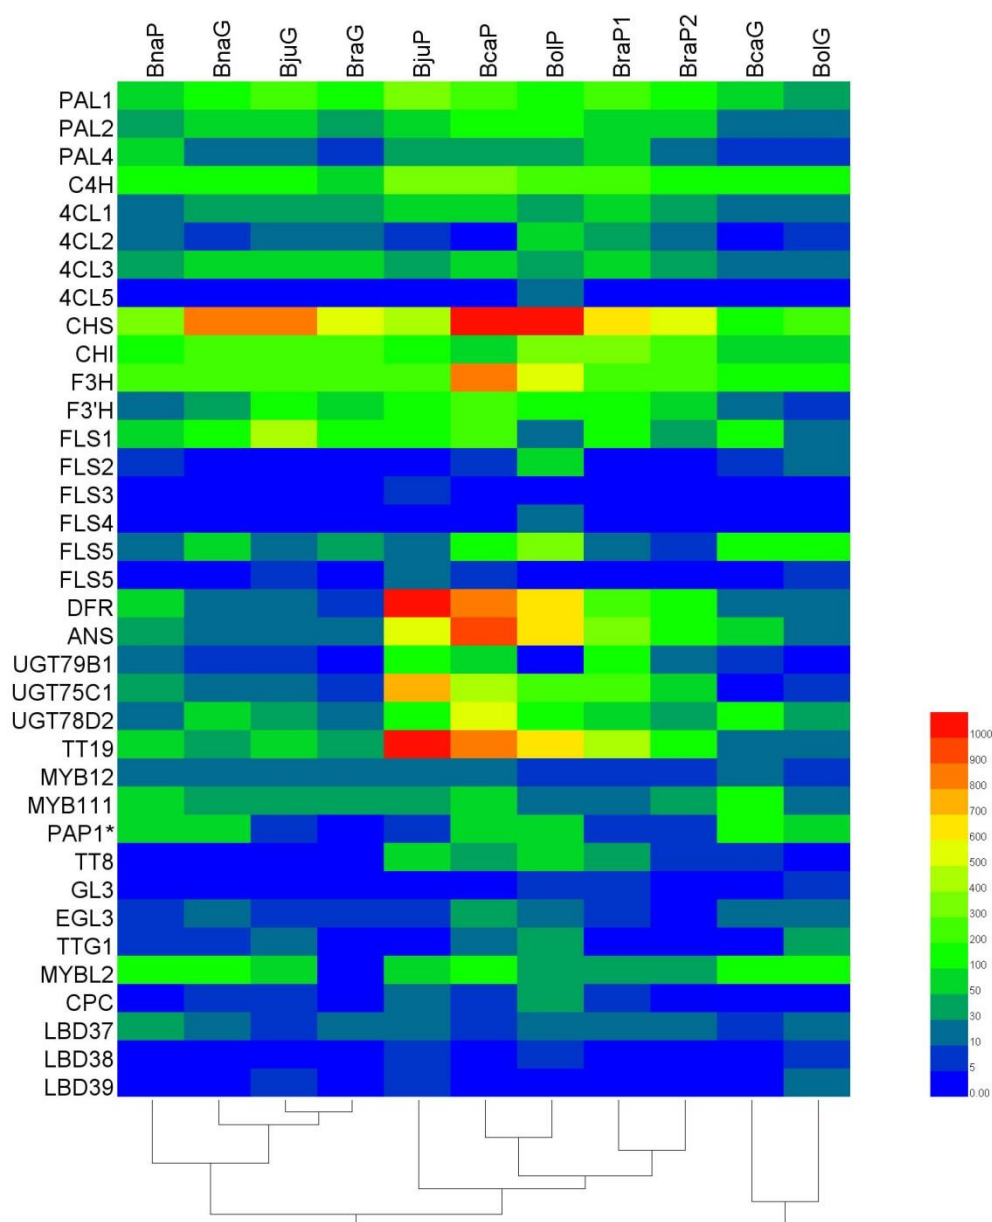

Figure S1. Clustering analysis of all genes in anthocyanin biosynthetic pathway based on total expression value between green and purple leaves. PAP1\* represent any of PAP1, PAP2, MYB113 and MYB114.
